# Supplementary material for: Effect of a novel gastric tube insertion method using a light-emitting diode source and fiber in neonates: a multicenter study (GATU-LED Study)
Source: Research Square preprint supplement (doi:10.21203/rs.3.rs-6534298/v1), 2025-05-08
Supplement: Supplementary file 1 [file 400befb7e026806906cfebd0.xlsx]

## Sheet: Table 3
	Suplementary table. The number of each position in participating NICU.
	Position	1	2	3	4	5
	Tokyo Metropolitan Children's Medical Center (n=37)	0	0	36	1	0
	Kagoshima City Hospital (n=26)	0	7	16	3	0
	Nihon University Itabashi Hospital (n=17)	0	1	13	3	0
	Osaka Women's and Children's Hospital (n=15)	0	2	11	2	0
	Kanagawa Children’s Medical Center (n=6)	0	1	5	0	0
	NICU, neonatal intensive care unit.
