# Supplementary material for: Effect of a novel gastric tube insertion method using a light-emitting diode source and fiber in neonates: a multicenter study (GATU-LED Study)
Source: Research Square preprint supplement (doi:10.21203/rs.3.rs-6534298/v1), 2025-05-08
Supplement: Supplementary file 2 [file 75022e6d0d10a46e1b164154.xlsx]

## Sheet: Table 1
	Table 1. A demographic characteristics of participated neonates (n=101)
		At birth	At insertion
	Gestational age [weeks]	35.0 (24.3-41.4)	36.1 (24.3-45.7)
	Weight [g]	2137 (410-4112)	2142 (410-4006)
	<1000g	8	4
	1000-1499g	15	14
	1500-2499g	44	47
	2500g-	34	36
	Length [cm]	44.0 (27.5-53.0)	44.5 (27.5-55.0)
	Female [n, %]	45 (44.6%)	0 (0-77)
	Nasogastric tube [n, %]		48 (47.5%)
			Median (range)
